# Supplementary material for: Construction of ternary TiO 2 /CdS/IrO 2 heterostructure photoanodes for efficient glycerol oxidation coupled with hydrogen evolution
Source: Royal Society of Chemistry journal article supplement (doi:10.1039/d4dt03048f), 2024-12-23
Supplement: d4dt03048f2.pdf [file d4dt03048f2.pdf]

## Supporting Information

### Construction of ternary $\text{TiO}_2/\text{CdS}/\text{IrO}_2$ heterostructure photoanodes for efficient glycerol oxidation coupled with hydrogen evolution

Chenfeng Jiang<sup>a</sup>, Yibo Ding<sup>a</sup>, Jiayu Lin<sup>a</sup>, Yi Sun<sup>b</sup>, Wei Zhou<sup>a</sup>, Xiaoyan Zhang<sup>\*a</sup>, Hongbin Zhao<sup>a</sup>, Weimin Cao<sup>a</sup>, Danhong Cheng<sup>a</sup>

<sup>a</sup>*Department of Chemistry, College of Sciences, Shanghai University, Shanghai 200444, China.*

<sup>b</sup>*Aerospace Hydrogen Energy (Shanghai) Technology Co., LTD, Shanghai, 200241, China*

*\*Corresponding authors:*

E-mail addresses: xyzhang\_dd@shu.edu.cn (X. Zhang).

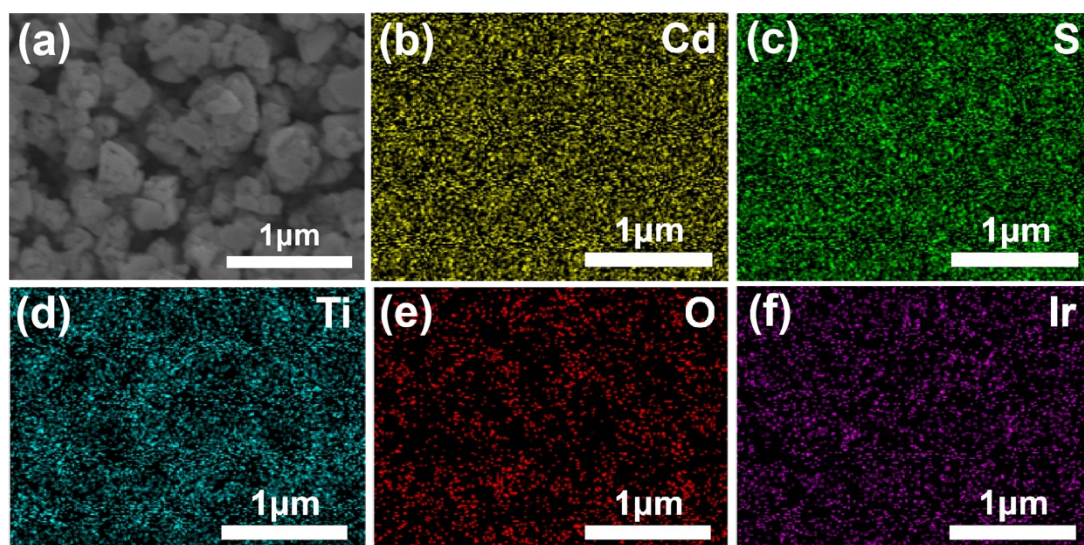

**Fig. S1.** (a) The SEM image of  $\text{TiO}_2/\text{CdS}/\text{IrO}_2$ , and the corresponding elemental mapping images of (b) Cd, (c) S, (d) Ti, (e) O and (f) Ir.

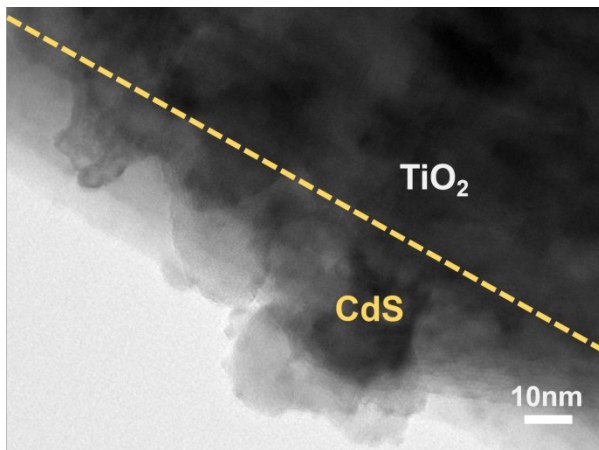

**Fig. S2.** The TEM image of  $\text{TiO}_2/\text{CdS}$

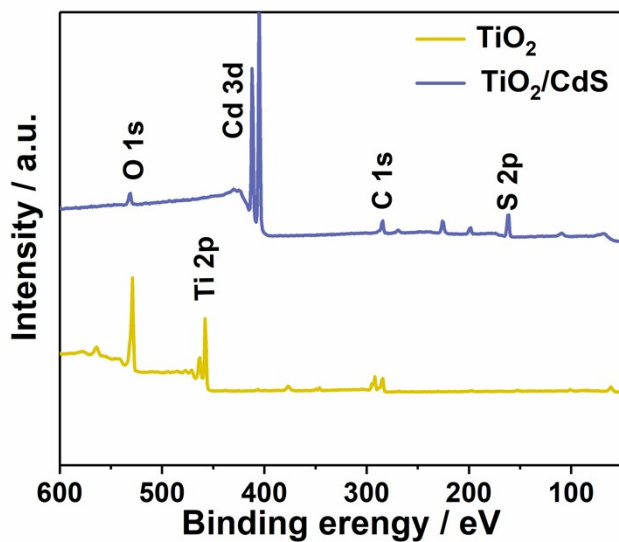

**Fig. S3.** The survey XPS spectra of the  $\text{TiO}_2$  and  $\text{TiO}_2/\text{CdS}$ .

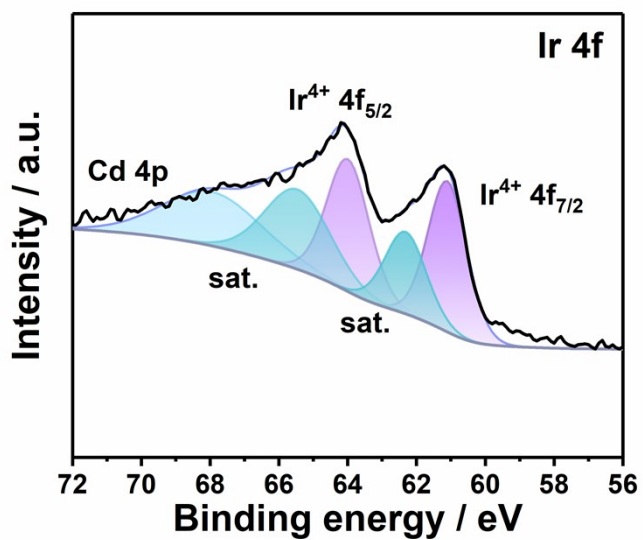

Fig. S4. The Ir fine XPS spectrum of TiO<sub>2</sub>/CdS/IrO<sub>2</sub>.

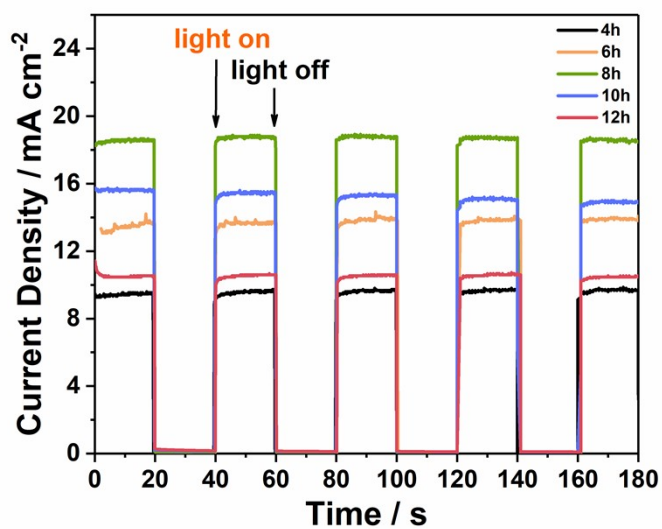

Fig. S5. Chopped *I-t* curves of the TiO<sub>2</sub>/CdS photoanodes synthesized with different hydrothermal times.

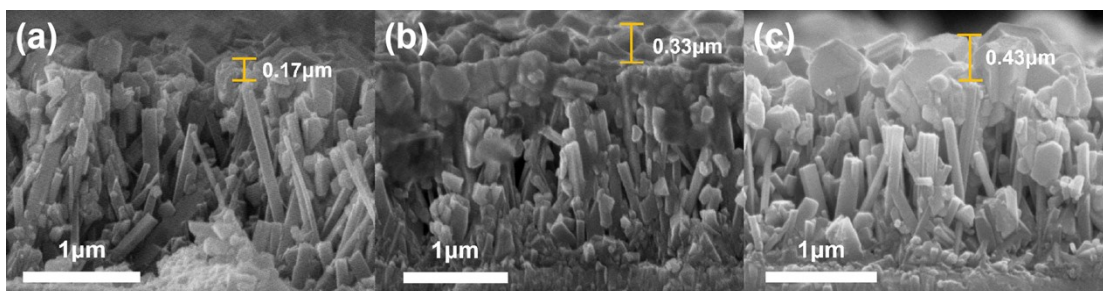

**Fig. S6.** SEM images of  $\text{TiO}_2/\text{CdS}$  with different hydrothermal reaction times: (a) 4 h, (b) 8 h, (c) 12 h.

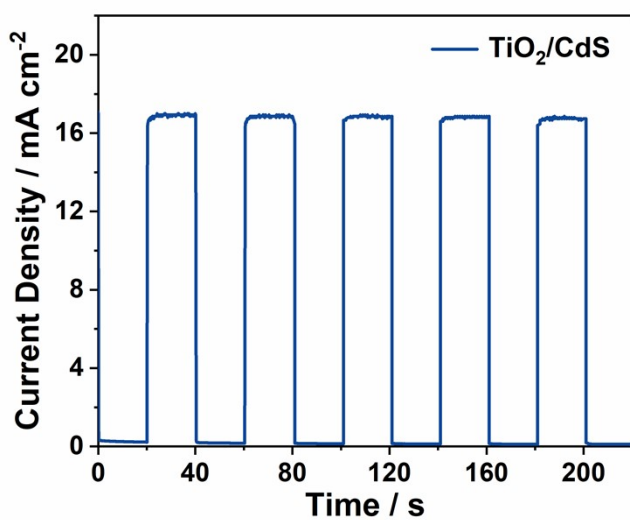

**Fig. S7.** Chopped  $I-t$  curve under bias-free condition.

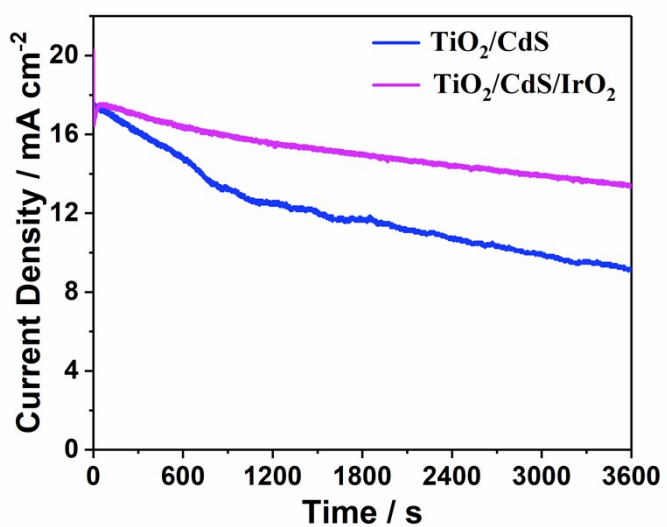

**Fig. S8.** Photocurrent density stabilities of  $\text{TiO}_2/\text{CdS}$ ,  $\text{TiO}_2/\text{CdS}/\text{IrO}_2$  photoanodes measure in 1 M KOH and 0.3 M glycerol solution under AM 1.5G sunlight ( $100 \text{ mW cm}^{-2}$ ).

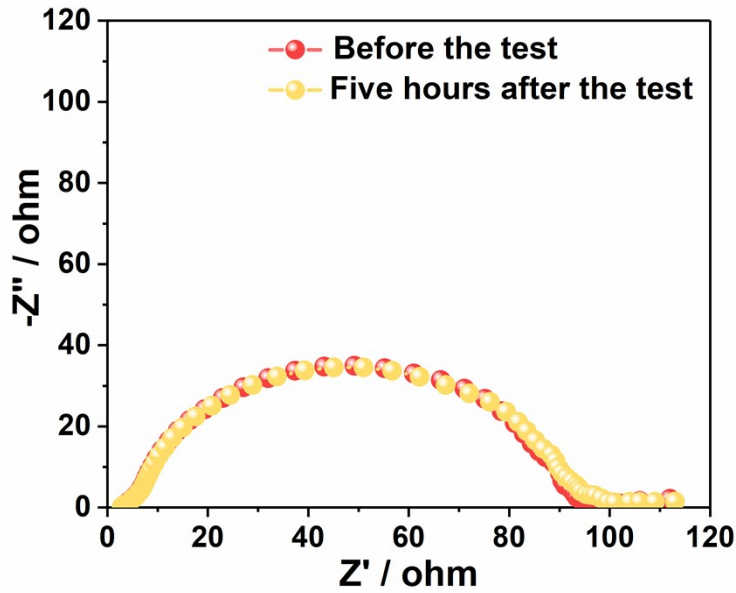

**Fig. S9.** Electrochemical impedance spectra of  $\text{TiO}_2/\text{CdS}$  before and after 5h stability test.

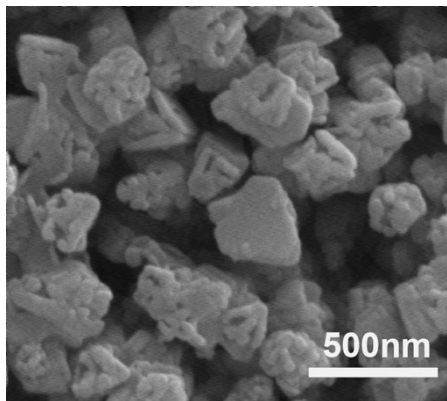

**Fig. S10.** SEM image of the  $\text{TiO}_2/\text{CdS}$  photoanode after long-term PEC measurement.

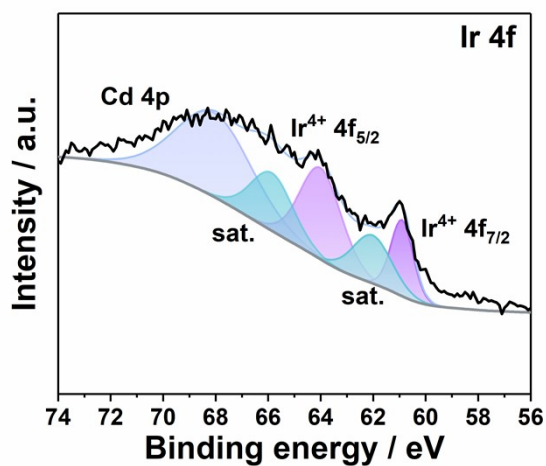

Fig. S11. XPS spectra of Ir of TiO<sub>2</sub>/CdS/IrO<sub>2</sub> after 1h reaction.

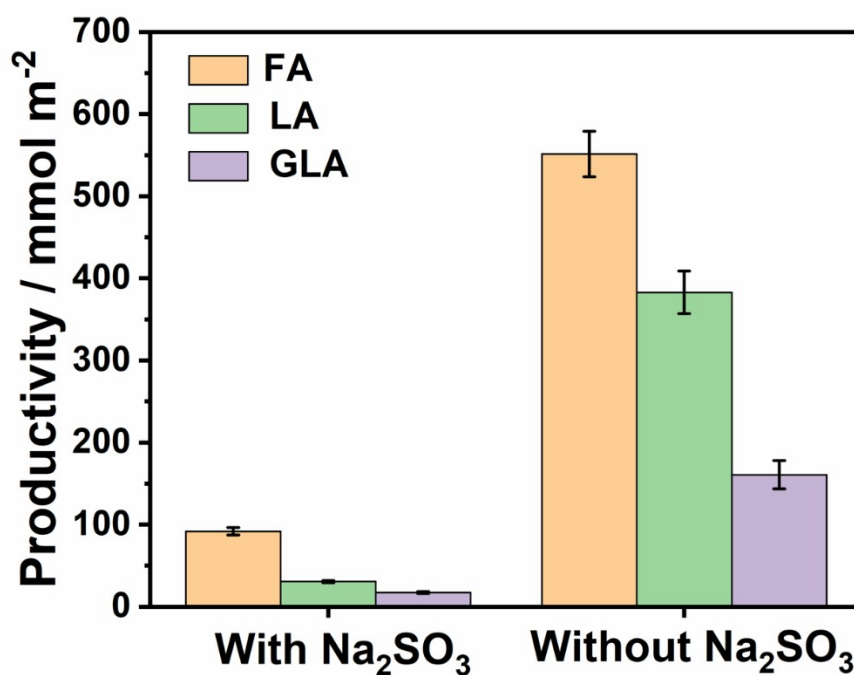

Fig. S12 The production rate of PEC glycerol oxidation products over TiO<sub>2</sub>/CdS/IrO<sub>2</sub> photoanode with and without the addition of 5 mM Na<sub>2</sub>SO<sub>3</sub>.

**Table S1.** Equivalent circuit analysis of EIS spectra for TiO<sub>2</sub>, CdS, TiO<sub>2</sub> /CdS and TiO<sub>2</sub>/CdS/IrO<sub>2</sub>

|                                        | Rs ( $\Omega$ ) | Rct ( $\Omega$ ) |
|----------------------------------------|-----------------|------------------|
| TiO <sub>2</sub>                       | 5.358           | 1048             |
| CdS                                    | 3.853           | 275.7            |
| TiO <sub>2</sub> /CdS                  | 5.36            | 87.12            |
| TiO <sub>2</sub> /CdS/IrO <sub>2</sub> | 5.526           | 75.02            |

**Table S2.** Comparison of H<sub>2</sub> evolution rate among various membrane electrodes.

| Photocatalysts                                   | Light Source                                   | Sacrificial reagent                                                   | Rate of H <sub>2</sub> evolution                                   |
|--------------------------------------------------|------------------------------------------------|-----------------------------------------------------------------------|--------------------------------------------------------------------|
| CdS/Ag/TiO <sub>2</sub> -NRs <sup>[1]</sup>      | Xe lamp                                        | 30 mg L <sup>-1</sup> nitrobenzene/                                   | 0.09 mmol h <sup>-1</sup> cm <sup>-2</sup><br>at 0.5 V vs. Ag/AgCl |
|                                                  | 100mw/cm <sup>2</sup><br>( $\lambda > 420$ nm) | 0.5 M Na <sub>2</sub> S+Na <sub>2</sub> SO <sub>3</sub><br>(pH 13.64) |                                                                    |
| TiO <sub>2</sub> -NR/CdS-<br>NiOx <sup>[2]</sup> | AM 1.5 G                                       | 0.5 M Na <sub>2</sub> S+0.5 M Na <sub>2</sub> SO <sub>4</sub>         | 1.3 mmol h <sup>-1</sup> cm <sup>-2</sup><br>at 0 V vs. Ag/AgCl    |

|                                                                            |                                                             |                                                                    |                                                                         |
|----------------------------------------------------------------------------|-------------------------------------------------------------|--------------------------------------------------------------------|-------------------------------------------------------------------------|
| TiO <sub>2</sub> /CdS/TiN<br>NRA <sup>[3]</sup>                            | 300 W Xe lamp                                               | 0.35 M Na <sub>2</sub> S+0.25 M<br>Na <sub>2</sub> SO <sub>3</sub> | 129.6 μmol cm <sup>-2</sup> h <sup>-1</sup><br>at 0 V vs. Ag/AgCl       |
| CdS/H-3D-TiO <sub>2</sub> /Pt-<br>wire <sup>[4]</sup>                      | 300 W Xe lamp                                               | 0.5 M Na <sub>2</sub> S+0.5 M Na <sub>2</sub> SO <sub>3</sub>      | 18.42 mmol cm <sup>-2</sup> h <sup>-1</sup><br>at 0.55 V vs.<br>Ag/AgCl |
| Cu <sub>2</sub> S-TiO <sub>2</sub> /TiO <sub>2</sub><br>NPs <sup>[5]</sup> | 100 W Xe lamp<br>(100 mW/cm <sup>2</sup> )<br>300 W Xe lamp | 1 M KOH                                                            | 55 μmol cm <sup>-2</sup> h <sup>-1</sup><br>at 0.5 V vs. RHE            |
| CdS/ZnS <sup>[6]</sup>                                                     | (λ > 420<br>nm)                                             | 0.5 M Na <sub>2</sub> S-Na <sub>2</sub> SO <sub>3</sub>            | 137 μmol cm <sup>-2</sup> h <sup>-1</sup>                               |
| WO <sub>3</sub> /BiVO <sub>4</sub> /Bi <sup>[7]</sup>                      | AM 1.5 G<br>(100 mW<br>cm <sup>-2</sup> )                   | 0.5 M Na <sub>2</sub> SO <sub>4</sub> +0.1 M<br>glycerol           | 328.8 mmol m <sup>-2</sup> h <sup>-1</sup><br>at 1.2 V vs. RHE          |
| TiO <sub>2</sub> /Bi <sub>2</sub> O <sub>3</sub> <sup>[8]</sup>            | AM 1.5G<br>(100 mW cm <sup>-2</sup> )                       | 0.5 M Na <sub>2</sub> SO <sub>4</sub> +0.1 M<br>glycerol           | 108.75 μmol cm <sup>-2</sup> h <sup>-1</sup><br>1.0 V vs. RHE           |
| TiO <sub>2</sub> /CdS (this work)                                          | 300 W Xe lamp                                               | 1M KOH+0.3 M glycerol                                              | 1574.5 mmol m <sup>-2</sup> h <sup>-1</sup><br>at 1.23 V vs. RHE        |
| TiO <sub>2</sub> /CdS/IrO <sub>2</sub><br>(this work)                      | 300 W Xe lamp                                               | 1M KOH+0.3 M glycerol                                              | 2345.2 mmol m <sup>-2</sup> h <sup>-1</sup><br>at 1.23 V vs. RHE        |

**Table S3.** The selectivity of glycerol oxidation products over TiO<sub>2</sub>/CdS and TiO<sub>2</sub>/CdS/IrO<sub>2</sub> photoanodes for 2 h reaction.

| Catalyst                               | Selectivity of FA<br>/% | Selectivity of LA<br>/% | Selectivity of<br>GLA /% |
|----------------------------------------|-------------------------|-------------------------|--------------------------|
| TiO <sub>2</sub> /CdS                  | 49.84                   | 35.78                   | 14.38                    |
| TiO <sub>2</sub> /CdS/IrO <sub>2</sub> | 53.22                   | 32.82                   | 13.96                    |



## References

- [1] Y. Zhang, C. Yuan, Q. Wang, M.R. Hoffmann, X. Zhang, J. Nie, C. Hu, S. Chen, J. Qiao, Q. Wang and Y. Cong, *Electrochim. Acta* **2019**, *328*, 135124.
- [2] I.-h. Yoo, S.S. Kalanur and H. Seo, *Appl. Catal. B-Environ.* **2019**, *250*, 200-212.
- [3] J. Li, L. Wang, W. Wang, X. Jia, Y. Zhang, H. Yang, Y. Li and Q. Zhou, *Appl. Catal. B-Environ.* **2023**, *334*, 122833.
- [4] J. Yan, X. Li, S. Yang, X. Wang, W. Zhou, Y. Fang, S. Zhang, F. Peng and S. Zhang, *Int. J. Hydrogen Energy* **2017**, *42*, 928-937.
- [5] S.V. Singh, U. Gupta, S. Biring, B. Mukherjee and B.N. Pal, *Surf. Interfaces* **2022**, *28*, 101660.
- [6] C. Guo, L. Chu, Q. Zhang, Z. Li, G. Yang and F. Peng, *J. Alloys Compd.* **2021**, *888*, 161620.
- [7] X. Feng, X. Feng and F. Zhang, *J. Mater. Chem. A* **2023**, *11*, 20242-20253.
- [8] L. Luo, W. Chen, S.M. Xu, J. Yang, M. Li, H. Zhou, M. Xu, M. Shao, X. Kong, Z. Li and H. Duan, *J. Am. Chem. Soc.* **2022**, *144*, 7720-7730.
